# Supplementary material for: Addition of an online, validated family history questionnaire to the Dutch FIT-based screening programme did not improve its diagnostic yield
Source: PubMed Central journal article supplement (PMC7283285; doi:10.1038/s41416-020-0832-8), 2020-04-20
Supplement: 41416_2020_832_MOESM1_ESM.pdf [file 41416_2020_832_MOESM1_ESM.pdf]

## **BIJLAGE 1: VOORBEELD DIGITALE VRAGENLIJST**

Het betreft hier een PDF versie van de digitale vragenlijst. In de werkelijke situatie worden de vragen één voor één gesteld.

### Vragenlijst erfelijke darmkanker - Vragen over uzelf

| Number | Question                                                                                                              | Answers                                                                                                                                                                                                                                                                                                                                                                                                                                                                                                                                                                                                      |
|--------|-----------------------------------------------------------------------------------------------------------------------|--------------------------------------------------------------------------------------------------------------------------------------------------------------------------------------------------------------------------------------------------------------------------------------------------------------------------------------------------------------------------------------------------------------------------------------------------------------------------------------------------------------------------------------------------------------------------------------------------------------|
| 2.1    | Heeft u ooit dikkedarmkanker gehad? Met dikkedarmkanker wordt ook endeldarmkanker bedoeld                             | <input type="radio"/> Ja<br><input type="radio"/> Nee                                                                                                                                                                                                                                                                                                                                                                                                                                                                                                                                                        |
| 2.1.1  | If 2.1 is equal to 'Ja' answer this question:<br>Hoe oud was u toen dit (voor het eerst) werd ontdekt?                | <input type="radio"/> Jonger dan 50 jaar<br><input type="radio"/> Tussen 50 en 70 jaar<br><input type="radio"/> Ouder dan 70 jaar                                                                                                                                                                                                                                                                                                                                                                                                                                                                            |
| 2.1.2  | If 2.1 is equal to 'Ja' answer this question:<br>Heeft u vaker dan 1x dikkedarmkanker gehad onder de 70 jaar?         | <input type="radio"/> Ja<br><input type="radio"/> Nee                                                                                                                                                                                                                                                                                                                                                                                                                                                                                                                                                        |
| 2.2    | Heeft u behalve dikkedarmkanker ooit een ander soort kanker gehad?                                                    | <input type="radio"/> Ja<br><input type="radio"/> Nee                                                                                                                                                                                                                                                                                                                                                                                                                                                                                                                                                        |
| 2.2.1  | If 2.2 is equal to 'Ja' answer this question:<br>Hoe oud was u toen dit werd ontdekt?                                 | <input type="radio"/> Jonger dan 50 jaar<br><input type="radio"/> Tussen 50 en 70 jaar<br><input type="radio"/> Ouder dan 70 jaar                                                                                                                                                                                                                                                                                                                                                                                                                                                                            |
| 2.2.2  | If 2.2 is equal to 'Ja' answer this question:<br>In welk orgaan zat deze kanker? U kunt meerdere antwoorden aanvinken | <input type="checkbox"/> Maag<br><input type="checkbox"/> Dunne darm (o.a. twaalfvingerige darm)<br><input type="checkbox"/> Alveesklier<br><input type="checkbox"/> Galwegen<br><input type="checkbox"/> Nierbekken<br><input type="checkbox"/> Nieren<br><input type="checkbox"/> Hogere urinewegen<br><input type="checkbox"/> Eierstokken<br><input type="checkbox"/> Hersenen<br><input type="checkbox"/> Talgklier (goedaardig of kwaadaardig)<br><input type="checkbox"/> Baarmoeder<br><input type="checkbox"/> Baarmoederhals (Hierop wordt getest met het uitstrijkje bij het bevolkingsonderzoek) |

- Prostaat
- Borst
- Huid
- Longen
- Lymfeklier/leukemie
- Slokdarm
- Anders
- Onbekend

## Vragenlijst erfelijke darmkanker - Erfelijkheidsonderzoek

| Number  | Question                                                                                                            | Answers                                                                                                                                                                                                                                        |
|---------|---------------------------------------------------------------------------------------------------------------------|------------------------------------------------------------------------------------------------------------------------------------------------------------------------------------------------------------------------------------------------|
| 3.1     | Is er in uw familie ooit erfelijkheidsonderzoek gedaan in verband met darmkanker?                                   | <input type="radio"/> Ja<br><input type="radio"/> Nee<br><input type="radio"/> Onbekend                                                                                                                                                        |
| 3.1.1   | <b>If 3.1 is equal to 'Ja' answer this question:</b><br>Is hierbij een erfelijke aanleg voor darmkanker aangetoond? | <input type="radio"/> Ja<br><input type="radio"/> Nee<br><input type="radio"/> Onbekend                                                                                                                                                        |
| 3.1.1.1 | <b>If 3.1.1 is equal to 'Ja' answer this question:</b><br>Wat is er aangetoond bij het erfelijkheidsonderzoek?      | <input type="radio"/> HNPCC/Syndroom van Lynch<br><input type="radio"/> Familiaire adenomateuze polyposis (FAP)<br><input type="radio"/> MUTYH geassocieerde polyposis (MAP)<br><input type="radio"/> Anders<br><input type="radio"/> Onbekend |
| 3.1.1.2 | <b>If 3.1.1 is equal to 'Ja' answer this question:</b><br>Bent u drager?                                            | <input type="radio"/> Ja<br><input type="radio"/> Nee<br><input type="radio"/> Onbekend                                                                                                                                                        |

## Vragenlijst erfelijke darmkanker - Vragen over uw moeder

| Number | Question                                    | Answers                                                                                 |
|--------|---------------------------------------------|-----------------------------------------------------------------------------------------|
| 4.1    | Heeft uw moeder ooit dikkedarmkanker gehad? | <input type="radio"/> Ja<br><input type="radio"/> Nee<br><input type="radio"/> Onbekend |

- 4.1.1 **If 4.1 is equal to 'Ja' answer this question:**  
Hoe oud was zij toen dit bij haar werd ontdekt?
- Jonger dan 50 jaar  
 Tussen 50 en 70 jaar  
 Ouder dan 70 jaar  
 Onbekend
- 
- 4.2 Heeft uw moeder ooit een ander soort kanker dan dikkedarmkanker gehad?
- Ja  
 Nee  
 Onbekend
- 
- 4.2.1 **If 4.2 is equal to 'Ja' answer this question:**  
Hoe oud was zij toen dit bij haar werd ontdekt?
- Jonger dan 50 jaar  
 Tussen 50 en 70 jaar  
 Ouder dan 70 jaar  
 Onbekend
- 
- 4.2.2 **If 4.2 is equal to 'Ja' answer this question:**  
In welk orgaan zat deze kanker? U kunt meerdere antwoorden aanvinken
- Maag  
 Dunne darm (o.a. twaalfvingerige darm)  
 Alveesklier  
 Galwegen  
 Nierbekken  
 Nieren  
 Hogere urinewegen  
 Eierstokken  
 Hersenen  
 Talgklier (goedaardig of kwaadaardig)  
 Baarmoeder  
 Baarmoederhals (Hierop wordt getest met het uitstrijkje bij het bevolkingsonderzoek)  
 Prostaat  
 Borst  
 Huid  
 Longen  
 Lymfeklier/leukemie  
 Slokdarm  
 Anders  
 Onbekend

## Vragenlijst erfelijke darmkanker - Vragen over uw vader

| Number | Question                                   | Answers                  |
|--------|--------------------------------------------|--------------------------|
| 5.1    | Heeft uw vader ooit dikkedarmkanker gehad? | <input type="radio"/> Ja |

- Nee  
 Onbekend

---

5.1.1 **If 5.1 is equal to 'Ja' answer this question:**  
Hoe oud was hij toen dit bij hem werd ontdekt?

- Jonger dan 50 jaar  
 Tussen 50 en 70 jaar  
 Ouder dan 70 jaar  
 Onbekend

---

5.2 Heeft uw vader ooit een ander soort kanker dan  
dikkedarmkanker gehad?

- Ja  
 Nee  
 Onbekend

---

5.2.1 **If 5.2 is equal to 'Ja' answer this question:**  
Hoe oud was hij toen dit bij hem werd ontdekt?

- Jonger dan 50 jaar  
 Tussen 50 en 70 jaar  
 Ouder dan 70 jaar  
 Onbekend

---

5.2.2 **If 5.2 is equal to 'Ja' answer this question:**  
In welk orgaan zat deze kanker? U kunt meerdere  
antwoorden aanvinken

- Maag  
 Dunne darm (o.a. twaalfvingerige darm)  
 Alveesklier  
 Galwegen  
 Nierbekken  
 Nieren  
 Hogere urinewegen  
 Eierstokken  
 Hersenen  
 Talgklier (goedaardig of kwaadaardig)  
 Baarmoeder  
 Baarmoederhals (Hierop wordt getest  
met het uitstrijkje bij het  
bevolkingsonderzoek)  
 Prostaat  
 Borst  
 Huid  
 Longen  
 Lymfeklier/leukemie  
 Slokdarm  
 Anders  
 Onbekend

## Vragenlijst erfelijke darmkanker - Vragen over eventuele broers/zussen

| Number  | Question                                                                                                                                                                                                                     | Answers                                                                                                                                                                                                                                              |
|---------|------------------------------------------------------------------------------------------------------------------------------------------------------------------------------------------------------------------------------|------------------------------------------------------------------------------------------------------------------------------------------------------------------------------------------------------------------------------------------------------|
| 6.1     | Hoeveel broers en/of zussen heeft u? Halfbroers en halfzussen tellen hierbij ook mee                                                                                                                                         | <input type="radio"/> 0<br><input type="radio"/> 1<br><input type="radio"/> 2<br><input type="radio"/> 3<br><input type="radio"/> Meer dan 3<br><input type="radio"/> Onbekend                                                                       |
| 6.1.1   | <b>If 6.1 is bigger than '0' answer this question:</b><br>Heeft een broer of zus van u ooit dikkedarmkanker gehad? Mocht u het niet van iedereen weten, vink dan het meest volledige antwoord aan                            | <input type="radio"/> Ja, 1 broer/zus<br><input type="radio"/> Ja, 2 broers/zussen<br><input type="radio"/> Ja, 3 broers/zussen<br><input type="radio"/> Ja, meer dan 3 broers/zussen<br><input type="radio"/> Nee<br><input type="radio"/> Onbekend |
| 6.1.1.1 | <b>If 6.1.1 is bigger than 'Nee' answer this question:</b><br>Hoe oud was broer of zus 1 toen dit werd ontdekt?                                                                                                              | <input type="radio"/> Jonger dan 50 jaar<br><input type="radio"/> Tussen 50 en 70 jaar<br><input type="radio"/> Ouder dan 70 jaar<br><input type="radio"/> Onbekend                                                                                  |
| 6.1.1.2 | <b>If 6.1.1 is bigger than 'Ja, 1 broer/zus' answer this question:</b><br>Hoe oud was broer of zus 2 toen dit werd ontdekt?                                                                                                  | <input type="radio"/> Jonger dan 50 jaar<br><input type="radio"/> Tussen 50 en 70 jaar<br><input type="radio"/> Ouder dan 70 jaar<br><input type="radio"/> Onbekend                                                                                  |
| 6.1.1.3 | <b>If 6.1.1 is bigger than 'Ja, 2 broers/zussen' answer this question:</b><br>Hoe oud was broer of zus 3 toen dit werd ontdekt?                                                                                              | <input type="radio"/> Jonger dan 50 jaar<br><input type="radio"/> Tussen 50 en 70 jaar<br><input type="radio"/> Ouder dan 70 jaar<br><input type="radio"/> Onbekend                                                                                  |
| 6.1.1.4 | <b>If 6.1.1 is bigger than 'Ja, 3 broers/zussen' answer this question:</b><br>Hoe oud was broer of zus 4 toen dit werd ontdekt?                                                                                              | <input type="radio"/> Jonger dan 50 jaar<br><input type="radio"/> Tussen 50 en 70 jaar<br><input type="radio"/> Ouder dan 70 jaar<br><input type="radio"/> Onbekend                                                                                  |
| 6.1.2   | <b>If 6.1 is bigger than '0' answer this question:</b><br>Heeft een broer of zus van u ooit een ander soort kanker dan dikkedarmkanker gehad? Mocht u het niet van iedereen weten, vink dan het meest volledige antwoord aan | <input type="radio"/> Ja, 1 broer/zus<br><input type="radio"/> Ja, 2 broers/zussen<br><input type="radio"/> Ja, 3 broers/zussen<br><input type="radio"/> Ja, meer dan 3 broers/zussen<br><input type="radio"/> Nee<br><input type="radio"/> Onbekend |
| 6.1.2.1 | <b>If 6.1.2 is bigger than 'Nee' answer this question:</b>                                                                                                                                                                   | <input type="radio"/> Jonger dan 50 jaar                                                                                                                                                                                                             |

Hoe oud was broer of zus 1 toen dit werd ontdekt?

- Jonger dan 50 jaar
- Tussen 50 en 70 jaar
- Ouder dan 70 jaar
- Onbekend

6.1.2.2 **If 6.1.2 is bigger than 'Nee' answer this question:**

In welk orgaan zat deze kanker? U kunt meerdere antwoorden aanvinken

- Maag
- Dunne darm (o.a. twaalfvingerige darm)
- Alveesklier
- Galwegen
- Nierbekken
- Nieren
- Hogere urinewegen
- Eierstokken
- Hersenen
- Talgklier (goedaardig of kwaadaardig)
- Baarmoeder
- Baarmoederhals (Hierop wordt getest met het uitstrijkje bij het bevolkingsonderzoek)
- Prostaat
- Borst
- Huid
- Longen
- Lymfeklier/leukemie
- Slokdarm
- Anders
- Onbekend

6.1.2.3 **If 6.1.2 is bigger than 'Ja, 1 broer/zus' answer this question:**

Hoe oud was broer of zus 2 toen dit werd ontdekt?

- Jonger dan 50 jaar
- Tussen 50 en 70 jaar
- Ouder dan 70 jaar
- Onbekend

6.1.2.4 **If 6.1.2 is bigger than 'Ja, 1 broer/zus' answer this question:**

In welk orgaan zat deze kanker? U kunt meerdere antwoorden aanvinken

- Maag
- Dunne darm (o.a. twaalfvingerige darm)
- Alveesklier
- Galwegen
- Nierbekken
- Nieren
- Hogere urinewegen
- Eierstokken
- Hersenen
- Talgklier (goedaardig of kwaadaardig)
- Baarmoeder
- Baarmoederhals (Hierop wordt getest met het uitstrijkje bij het bevolkingsonderzoek)

Prostaat Borst Huid Longen Lymfeklier/leukemie Slokdarm Anders Onbekend

6.1.2.5 **If 6.1.2 is bigger than 'Ja, 2 broers/zussen' answer this question:**

Hoe oud was broer of zus 3 toen dit werd ontdekt?

 Jonger dan 50 jaar Tussen 50 en 70 jaar Ouder dan 70 jaar Onbekend

6.1.2.6 **If 6.1.2 is bigger than 'Ja, 2 broers/zussen' answer this question:**

In welk orgaan zat deze kanker? U kunt meerdere antwoorden aanvinken

 Maag Dunne darm (o.a. twaalfvingerige darm) Alveesklier Galwegen Nierbekken Nieren Hogere urinewegen Eierstokken Hersenen Talgklier (goedaardig of kwaadaardig) Baarmoeder Baarmoederhals (Hierop wordt getest met het uitstrijkje bij het bevolkingsonderzoek) Prostaat Borst Huid Longen Lymfeklier/leukemie Slokdarm Anders Onbekend

6.1.2.7 **If 6.1.2 is bigger than 'Ja, 3 broers/zussen' answer this question:**

Hoe oud was broer of zus 4 toen dit werd ontdekt?

 Jonger dan 50 jaar Tussen 50 en 70 jaar Ouder dan 70 jaar Onbekend

6.1.2.8 **If 6.1.2 is bigger than 'Ja, 3 broers/zussen' answer this question:**

In welk orgaan zat deze kanker? U kunt meerdere antwoorden aanvinken

 Maag Dunne darm (o.a. twaalfvingerige darm) Alveesklier

- Galwegen
- Nierbekken
- Nieren
- Hogere urinewegen
- Eierstokken
- Hersenen
- Talgklier (goedaardig of kwaadaardig)
- Baarmoeder
- Baarmoederhals (Hierop wordt getest met het uitstrijkje bij het bevolkingsonderzoek)
- Prostaat
- Borst
- Huid
- Longen
- Lymfeklier/leukemie
- Slokdarm
- Anders
- Onbekend

## Vragenlijst erfelijke darmkanker - Vragen over eventuele kinderen

| Number  | Question                                                                                                                                                                                            | Answers                                                                                                                                                                                                                          |
|---------|-----------------------------------------------------------------------------------------------------------------------------------------------------------------------------------------------------|----------------------------------------------------------------------------------------------------------------------------------------------------------------------------------------------------------------------------------|
| 7.1     | Hoeveel kinderen heeft u?                                                                                                                                                                           | <input type="radio"/> 0<br><input type="radio"/> 1<br><input type="radio"/> 2<br><input type="radio"/> 3<br><input type="radio"/> Meer dan 3<br><input type="radio"/> Onbekend                                                   |
| 7.1.1   | <b><i>If 7.1 is bigger than '0' answer this question:</i></b><br>Heeft een kind van u ooit dikkedarmkanker gehad?<br>Mocht u het niet van iedereen weten, vink dan het meest volledige antwoord aan | <input type="radio"/> Ja, 1 kind<br><input type="radio"/> Ja, 2 kinderen<br><input type="radio"/> Ja, 3 kinderen<br><input type="radio"/> Ja, meer dan 3 kinderen<br><input type="radio"/> Nee<br><input type="radio"/> Onbekend |
| 7.1.1.1 | <b><i>If 7.1.1 is bigger than 'Nee' answer this question:</i></b><br>Hoe oud was kind 1 toen dit werd ontdekt?                                                                                      | <input type="radio"/> Jonger dan 50 jaar<br><input type="radio"/> Tussen 50 en 70 jaar<br><input type="radio"/> Ouder dan 70 jaar<br><input type="radio"/> Onbekend                                                              |



- 
- 7.1.1.2 **If 7.1.1 is bigger than 'Ja, 1 kind' answer this question:**  
Hoe oud was kind 2 toen dit werd ontdekt?
- Jonger dan 50 jaar  
 Tussen 50 en 70 jaar  
 Ouder dan 70 jaar  
 Onbekend
- 
- 7.1.1.3 **If 7.1.1 is bigger than 'Ja, 2 kinderen' answer this question:**  
Hoe oud was kind 3 toen dit werd ontdekt?
- Jonger dan 50 jaar  
 Tussen 50 en 70 jaar  
 Ouder dan 70 jaar  
 Onbekend
- 
- 7.1.1.4 **If 7.1.1 is bigger than 'Ja, 3 kinderen' answer this question:**  
Hoe oud was kind 4 toen dit werd ontdekt?
- Jonger dan 50 jaar  
 Tussen 50 en 70 jaar  
 Ouder dan 70 jaar  
 Onbekend
- 
- 7.1.2 **If 7.1 is bigger than '0' answer this question:**  
Heeft een kind van u ooit een ander soort kanker dan dikkedarmkanker gehad? Mocht u het niet van iedereen weten, vink dan het meest volledige antwoord aan
- Ja, 1 kind  
 Ja, 2 kinderen  
 Ja, 3 kinderen  
 Ja, meer dan 3 kinderen  
 Nee  
 Onbekend
- 
- 7.1.2.1 **If 7.1.2 is bigger than 'Nee' answer this question:**  
Hoe oud was kind 1 toen dit werd ontdekt?
- Jonger dan 50 jaar  
 Tussen 50 en 70 jaar  
 Ouder dan 70 jaar  
 Onbekend
- 
- 7.1.2.2 **If 7.1.2 is bigger than 'Nee' answer this question:**  
In welk orgaan zat deze kanker? U kunt meerdere antwoorden aanvinken
- Maag  
 Dunne darm (o.a. twaalfvingerige darm)  
 Alveesklier  
 Galwegen  
 Nierbekken  
 Nieren  
 Hogere urinewegen  
 Eierstokken  
 Hersenen  
 Talgklier (goedaardig of kwaadaardig)  
 Baarmoeder  
 Baarmoederhals (Hierop wordt getest met het uitstrijkje bij het bevolkingsonderzoek)  
 Prostaat  
 Borst  
 Huid

- Longen
- Lymfeklier/leukemie
- Slokdarm
- Anders
- Onbekend

7.1.2.3 **If 7.1.2 is bigger than 'Ja, 1 kind' answer this question:**

Hoe oud was kind 2 toen dit werd ontdekt?

- Jonger dan 50 jaar
- Tussen 50 en 70 jaar
- Ouder dan 70 jaar
- Onbekend

7.1.2.4 **If 7.1.2 is bigger than 'Ja, 1 kind' answer this question:**

In welk orgaan zat deze kanker? U kunt meerdere antwoorden aanvinken

- Maag
- Dunne darm (o.a. twaalfvingerige darm)
- Alveesklier
- Galwegen
- Nierbekken
- Nieren
- Hogere urinewegen
- Eierstokken
- Hersenen
- Talgklier (goedaardig of kwaadaardig)
- Baarmoeder
- Baarmoederhals (Hierop wordt getest met het uitstrijkje bij het bevolkingsonderzoek)
- Prostaat
- Borst
- Huid
- Longen
- Lymfeklier/leukemie
- Slokdarm
- Anders
- Onbekend

7.1.2.5 **If 7.1.2 is bigger than 'Ja, 2 kinderen' answer this question:**

Hoe oud was kind 3 toen dit werd ontdekt?

- Jonger dan 50 jaar
- Tussen 50 en 70 jaar
- Ouder dan 70 jaar
- Onbekend

7.1.2.6 **If 7.1.2 is bigger than 'Ja, 2 kinderen' answer this question:**

In welk orgaan zat deze kanker? U kunt meerdere antwoorden aanvinken

- Maag
- Dunne darm (o.a. twaalfvingerige darm)
- Alveesklier
- Galwegen
- Nierbekken
- Nieren
- Hogere urinewegen

Hogere urinewegen

- Eierstokken
- Hersenen
- Talgklier (goedaardig of kwaadaardig)
- Baarmoeder
- Baarmoederhals (Hierop wordt getest met het uitstrijkje bij het bevolkingsonderzoek)
- Prostaat
- Borst
- Huid
- Longen
- Lymfeklier/leukemie
- Slokdarm
- Anders
- Onbekend

7.1.2.7 **If 7.1.2 is bigger than 'Ja, 3 kinderen' answer this question:**  
Hoe oud was kind 4 toen dit werd ontdekt?

- Jonger dan 50 jaar
- Tussen 50 en 70 jaar
- Ouder dan 70 jaar
- Onbekend

7.1.2.8 **If 7.1.2 is bigger than 'Ja, 3 kinderen' answer this question:**  
In welk orgaan zat deze kanker? U kunt meerdere antwoorden aanvinken

- Maag
- Dunne darm (o.a. twaalfvingerige darm)
- Alveesklier
- Galwegen
- Nierbekken
- Nieren
- Hogere urinewegen
- Eierstokken
- Hersenen
- Talgklier (goedaardig of kwaadaardig)
- Baarmoeder
- Baarmoederhals (Hierop wordt getest met het uitstrijkje bij het bevolkingsonderzoek)
- Prostaat
- Borst
- Huid
- Longen
- Lymfeklier/leukemie
- Slokdarm
- Anders
- Onbekend

# Vragenlijst erfelijke darmkanker - Vragen over grootouders

| Number | Question                                                                                                                                                                                                       | Answers                                                                                                                                                                                                                                |
|--------|----------------------------------------------------------------------------------------------------------------------------------------------------------------------------------------------------------------|----------------------------------------------------------------------------------------------------------------------------------------------------------------------------------------------------------------------------------------|
| 8.1    | Heeft een van uw grootouders ooit dikkedarmkanker gehad? Met grootouders worden de vader en moeder van uw eigen ouders bedoeld. Mocht u het niet van iedereen weten, vink dan het meest volledige antwoord aan | <input type="radio"/> Ja, 1 grootouder<br><input type="radio"/> Ja, 2 grootouders<br><input type="radio"/> Ja, 3 grootouders<br><input type="radio"/> Ja, 4 grootouders<br><input type="radio"/> Nee<br><input type="radio"/> Onbekend |
| 8.1.1  | <b>If 8.1 is bigger than 'Nee' answer this question:</b><br>Hoe oud was grootouder 1 toen dit werd ontdekt?                                                                                                    | <input type="radio"/> Jonger dan 50 jaar<br><input type="radio"/> Tussen 50 en 70 jaar<br><input type="radio"/> Ouder dan 70 jaar<br><input type="radio"/> Onbekend                                                                    |
| 8.1.2  | <b>If 8.1 is bigger than 'Nee' answer this question:</b><br>Kruis aan om wie het hierbij ging:                                                                                                                 | <input type="radio"/> De vader van uw vader<br><input type="radio"/> De moeder van uw vader<br><input type="radio"/> De vader van uw moeder<br><input type="radio"/> De moeder van uw moeder                                           |
| 8.1.3  | <b>If 8.1 is bigger than 'Ja, 1 grootouder' answer this question:</b><br>Hoe oud was grootouder 2 toen dit werd ontdekt?                                                                                       | <input type="radio"/> Jonger dan 50 jaar<br><input type="radio"/> Tussen 50 en 70 jaar<br><input type="radio"/> Ouder dan 70 jaar<br><input type="radio"/> Onbekend                                                                    |
| 8.1.4  | <b>If 8.1 is bigger than 'Ja, 1 grootouder' answer this question:</b><br>Kruis aan om wie het hierbij ging:                                                                                                    | <input type="radio"/> De vader van uw vader<br><input type="radio"/> De moeder van uw vader<br><input type="radio"/> De vader van uw moeder<br><input type="radio"/> De moeder van uw moeder                                           |
| 8.1.5  | <b>If 8.1 is bigger than 'Ja, 2 grootouders' answer this question:</b><br>Hoe oud was grootouder 3 toen dit werd ontdekt?                                                                                      | <input type="radio"/> Jonger dan 50 jaar<br><input type="radio"/> Tussen 50 en 70 jaar<br><input type="radio"/> Ouder dan 70 jaar<br><input type="radio"/> Onbekend                                                                    |
| 8.1.6  | <b>If 8.1 is bigger than 'Ja, 2 grootouders' answer this question:</b><br>Kruis aan om wie het hierbij ging:                                                                                                   | <input type="radio"/> De vader van uw vader<br><input type="radio"/> De moeder van uw vader<br><input type="radio"/> De vader van uw moeder<br><input type="radio"/> De moeder van uw moeder                                           |
| 8.1.7  | <b>If 8.1 is bigger than 'Ja, 3 grootouders' answer this question:</b>                                                                                                                                         | <input type="radio"/> Jonger dan 50 jaar<br><input type="radio"/> Tussen 50 en 70 jaar                                                                                                                                                 |

Hoe oud was grootouder 4 toen dit werd ontdekt?

- Ouder dan 70 jaar  
 Onbekend

8.1.8 **If 8.1 is bigger than 'Ja, 3 grootouders' answer this question:**

Kruis aan om wie het hierbij ging:

- De vader van uw vader  
 De moeder van uw vader  
 De vader van uw moeder  
 De moeder van uw moeder

8.2 Heeft een van uw grootouders ooit een ander soort kanker dan dikkedarmkanker gehad? Mocht u het niet van iedereen weten, vink dan het meest volledige antwoord aan

- Ja, 1 grootouder  
 Ja, 2 grootouders  
 Ja, 3 grootouders  
 Ja, 4 grootouders  
 Nee  
 Onbekend

8.2.1 **If 8.2 is bigger than 'Nee' answer this question:**  
Hoe oud was grootouder 1 toen dit werd ontdekt?

- Jonger dan 50 jaar  
 Tussen 50 en 70 jaar  
 Ouder dan 70 jaar  
 Onbekend

8.2.2 **If 8.2 is bigger than 'Nee' answer this question:**  
Kruis aan om wie het hierbij ging:

- De vader van uw vader  
 De moeder van uw vader  
 De vader van uw moeder  
 De moeder van uw moeder

8.2.3 **If 8.2 is bigger than 'Nee' answer this question:**  
In welk orgaan zat deze kanker? U kunt meerdere antwoorden aanvinken

- Maag  
 Dunne darm (o.a. twaalfvingerige darm)  
 Alveesklier  
 Galwegen  
 Nierbekken  
 Nieren  
 Hogere urinewegen  
 Eierstokken  
 Hersenen  
 Talgklier (goedaardig of kwaadaardig)  
 Baarmoeder  
 Baarmoederhals (Hierop wordt getest met het uitstrijkje bij het bevolkingsonderzoek)  
 Prostaat  
 Borst  
 Huid  
 Longen  
 Lymfeklier/leukemie  
 Slokdarm

- Anders  
 Onbekend

---

8.2.4 ***If 8.2 is bigger than 'Ja, 1 grootouder' answer this question:***  
Hoe oud was grootouder 2 toen dit werd ontdekt?

- Jonger dan 50 jaar  
 Tussen 50 en 70 jaar  
 Ouder dan 70 jaar  
 Onbekend

---

8.2.5 ***If 8.2 is bigger than 'Ja, 1 grootouder' answer this question:***  
Kruis aan om wie het hierbij ging:

- De vader van uw vader  
 De moeder van uw vader  
 De vader van uw moeder  
 De moeder van uw moeder

---

8.2.6 ***If 8.2 is bigger than 'Ja, 1 grootouder' answer this question:***  
In welk orgaan zat deze kanker? U kunt meerdere antwoorden aanvinken

- Maag  
 Dunne darm (o.a. twaalfvingerige darm)  
 Alveesklier  
 Galwegen  
 Nierbekken  
 Nieren  
 Hogere urinewegen  
 Eierstokken  
 Hersenen  
 Talgklier (goedaardig of kwaadaardig)  
 Baarmoeder  
 Baarmoederhals (Hierop wordt getest met het uitstrijkje bij het bevolkingsonderzoek)  
 Prostaat  
 Borst  
 Huid  
 Longen  
 Lymfeklier/leukemie  
 Slokdarm  
 Anders  
 Onbekend

---

8.2.7 ***If 8.2 is bigger than 'Ja, 2 grootouders' answer this question:***  
Hoe oud was grootouder 3 toen dit werd ontdekt?

- Jonger dan 50 jaar  
 Tussen 50 en 70 jaar  
 Ouder dan 70 jaar  
 Onbekend

---

8.2.8 ***If 8.2 is bigger than 'Ja, 2 grootouders' answer this question:***  
Kruis aan om wie het hierbij ging:

- De vader van uw vader  
 De moeder van uw vader  
 De vader van uw moeder  
 De moeder van uw moeder

- 
- 8.2.9 **If 8.2 is bigger than 'Ja, 2 grootouders' answer this question:**  
In welk orgaan zat deze kanker? U kunt meerdere antwoorden aanvinken
- Maag
  - Dunne darm (o.a. twaalfvingerige darm)
  - Alveesklier
  - Galwegen
  - Nierbekken
  - Nieren
  - Hogere urinewegen
  - Eierstokken
  - Hersenen
  - Talgklier (goedaardig of kwaadaardig)
  - Baarmoeder
  - Baarmoederhals (Hierop wordt getest met het uitstrijkje bij het bevolkingsonderzoek)
  - Prostaat
  - Borst
  - Huid
  - Longen
  - Lymfeklier/leukemie
  - Slokdarm
  - Anders
  - Onbekend
- 
- 8.2.10 **If 8.2 is bigger than 'Ja, 3 grootouders' answer this question:**  
Hoe oud was grootouder 4 toen dit werd ontdekt?
- Jonger dan 50 jaar
  - Tussen 50 en 70 jaar
  - Ouder dan 70 jaar
  - Onbekend
- 
- 8.2.11 **If 8.2 is bigger than 'Ja, 3 grootouders' answer this question:**  
Kruis aan om wie het hierbij ging:
- De vader van uw vader
  - De moeder van uw vader
  - De vader van uw moeder
  - De moeder van uw moeder
- 
- 8.2.12 **If 8.2 is bigger than 'Ja, 3 grootouders' answer this question:**  
In welk orgaan zat deze kanker? U kunt meerdere antwoorden aanvinken
- Maag
  - Dunne darm (o.a. twaalfvingerige darm)
  - Alveesklier
  - Galwegen
  - Nierbekken
  - Nieren
  - Hogere urinewegen
  - Eierstokken
  - Hersenen
  - Talgklier (goedaardig of kwaadaardig)
  - Baarmoeder
  - Baarmoederhals (Hierop wordt getest

met het uitstrijkje bij het  
bevolkingsonderzoek)

- Prostaat
- Borst
- Huid
- Longen
- Lymfeklier/leukemie
- Slokdarm
- Anders
- Onbekend

## Vragenlijst erfelijke darmkanker - Vragen over eventuele kinderen van broers/zussen

| Number  | Question                                                                                                                                                                                                            | Answers                                                                                                                                                                                                                          |
|---------|---------------------------------------------------------------------------------------------------------------------------------------------------------------------------------------------------------------------|----------------------------------------------------------------------------------------------------------------------------------------------------------------------------------------------------------------------------------|
| 9.1     | <b><i>If 6.1 is bigger than '0' answer this question:</i></b><br>Heeft een van uw broers en/of zussen kinderen (ook degenen die overleden zijn)? Dit zijn dus uw neven en nichten                                   | <input type="radio"/> Ja<br><input type="radio"/> Nee<br><input type="radio"/> Onbekend                                                                                                                                          |
| 9.1.1   | <b><i>If 9.1 is equal to 'Ja' answer this question:</i></b><br>Heeft een kind van uw broers en/of zussen ooit dikkedarmkanker gehad? Mocht u het niet van iedereen weten, vink dan het meest volledige antwoord aan | <input type="radio"/> Ja, 1 kind<br><input type="radio"/> Ja, 2 kinderen<br><input type="radio"/> Ja, 3 kinderen<br><input type="radio"/> Ja, meer dan 3 kinderen<br><input type="radio"/> Nee<br><input type="radio"/> Onbekend |
| 9.1.1.1 | <b><i>If 9.1.1 is bigger than 'Nee' answer this question:</i></b><br>Hoe oud was kind 1 toen dit werd ontdekt?                                                                                                      | <input type="radio"/> Jonger dan 50 jaar<br><input type="radio"/> Tussen 50 en 70 jaar<br><input type="radio"/> Ouder dan 70 jaar<br><input type="radio"/> Onbekend                                                              |
| 9.1.1.2 | <b><i>If 9.1.1 is bigger than 'Ja, 1 kind' answer this question:</i></b><br>Hoe oud was kind 2 toen dit werd ontdekt?                                                                                               | <input type="radio"/> Jonger dan 50 jaar<br><input type="radio"/> Tussen 50 en 70 jaar<br><input type="radio"/> Ouder dan 70 jaar<br><input type="radio"/> Onbekend                                                              |
| 9.1.1.3 | <b><i>If 9.1.1 is bigger than 'Ja, 2 kinderen' answer this question:</i></b><br>Hoe oud was kind 3 toen dit werd ontdekt?                                                                                           | <input type="radio"/> Jonger dan 50 jaar<br><input type="radio"/> Tussen 50 en 70 jaar<br><input type="radio"/> Ouder dan 70 jaar<br><input type="radio"/> Onbekend                                                              |



9.1.1.4 **If 9.1.1 is bigger than 'Ja, 3 kinderen' answer this**

**question:**

Hoe oud was kind 4 toen dit werd ontdekt?

- Jonger dan 50 jaar  
 Tussen 50 en 70 jaar  
 Ouder dan 70 jaar  
 Onbekend

9.1.2 **If 9.1 is equal to 'Ja' answer this question:**

Heeft een kind van uw broers en/of zussen ooit een ander soort kanker dan dikkedarmkanker gehad? Mocht u het niet van iedereen weten, vink dan het meest volledige antwoord aan

- Ja, 1 kind  
 Ja, 2 kinderen  
 Ja, 3 kinderen  
 Ja, meer dan 3 kinderen  
 Nee  
 Onbekend

9.1.2.1 **If 9.1.2 is bigger than 'Nee' answer this question:**

Hoe oud was kind 1 toen dit werd ontdekt?

- Jonger dan 50 jaar  
 Tussen 50 en 70 jaar  
 Ouder dan 70 jaar  
 Onbekend

9.1.2.2 **If 9.1.2 is bigger than 'Nee' answer this question:**

In welk orgaan zat deze kanker? U kunt meerdere antwoorden aanvinken

- Maag  
 Dunne darm (o.a. twaalfvingerige darm)  
 Alveesklier  
 Galwegen  
 Nierbekken  
 Nieren  
 Hogere urinewegen  
 Eierstokken  
 Hersenen  
 Talgklier (goedaardig of kwaadaardig)  
 Baarmoeder  
 Baarmoederhals (Hierop wordt getest met het uitstrijkje bij het bevolkingsonderzoek)  
 Prostaat  
 Borst  
 Huid  
 Longen  
 Lymfeklier/leukemie  
 Slokdarm  
 Anders  
 Onbekend

9.1.2.3 **If 9.1.2 is bigger than 'Ja, 1 kind' answer this**

**question:**

Hoe oud was kind 2 toen dit werd ontdekt?

- Jonger dan 50 jaar  
 Tussen 50 en 70 jaar  
 Ouder dan 70 jaar  
 Onbekend

9.1.2.4 **If 9.1.2 is bigger than 'Ja, 1 kind' answer this**

9.1.2.4

**If 9.1.2 is bigger than 'Ja, 1 kind' answer this question:**

In welk orgaan zat deze kanker? U kunt meerdere antwoorden aanvinken

- Maag
- Dunne darm (o.a. twaalfvingerige darm)
- Alveesklier
- Galwegen
- Nierbekken
- Nieren
- Hogere urinewegen
- Eierstokken
- Hersenen
- Talgklier (goedaardig of kwaadaardig)
- Baarmoeder
- Baarmoederhals (Hierop wordt getest met het uitstrijkje bij het bevolkingsonderzoek)
- Prostaat
- Borst
- Huid
- Longen
- Lymfeklier/leukemie
- Slokdarm
- Anders
- Onbekend

9.1.2.5

**If 9.1.2 is bigger than 'Ja, 2 kinderen' answer this question:**

Hoe oud was kind 3 toen dit werd ontdekt?

- Jonger dan 50 jaar
- Tussen 50 en 70 jaar
- Ouder dan 70 jaar
- Onbekend

9.1.2.6

**If 9.1.2 is bigger than 'Ja, 2 kinderen' answer this question:**

In welk orgaan zat deze kanker? U kunt meerdere antwoorden aanvinken

- Maag
- Dunne darm (o.a. twaalfvingerige darm)
- Alveesklier
- Galwegen
- Nierbekken
- Nieren
- Hogere urinewegen
- Eierstokken
- Hersenen
- Talgklier (goedaardig of kwaadaardig)
- Baarmoeder
- Baarmoederhals (Hierop wordt getest met het uitstrijkje bij het bevolkingsonderzoek)
- Prostaat
- Borst
- Huid
- Longen
- Lymfeklier/leukemie

- Slokdarm  
 Anders  
 Onbekend

9.1.2.7 **If 9.1.2 is bigger than 'Ja, 3 kinderen' answer this question:**

Hoe oud was kind 4 toen dit werd ontdekt?

- Jonger dan 50 jaar  
 Tussen 50 en 70 jaar  
 Ouder dan 70 jaar  
 Onbekend

9.1.2.8 **If 9.1.2 is bigger than 'Ja, 3 kinderen' answer this question:**

In welk orgaan zat deze kanker? U kunt meerdere antwoorden aanvinken

- Maag  
 Dunne darm (o.a. twaalfvingerige darm)  
 Alveesklier  
 Galwegen  
 Nierbekken  
 Nieren  
 Hogere urinewegen  
 Eierstokken  
 Hersenen  
 Talgklier (goedaardig of kwaadaardig)  
 Baarmoeder  
 Baarmoederhals (Hierop wordt getest met het uitstrijkje bij het bevolkingsonderzoek)  
 Prostaat  
 Borst  
 Huid  
 Longen  
 Lymfeklier/leukemie  
 Slokdarm  
 Anders  
 Onbekend

## Vragenlijst erfelijke darmkanker - Vragen over eventuele broers/zussen van moeder

| Number | Question                                                                                                        | Answers                                                                                                                                      |
|--------|-----------------------------------------------------------------------------------------------------------------|----------------------------------------------------------------------------------------------------------------------------------------------|
| 10.1   | Hoeveel broers en/of zussen heeft uw moeder (ook degenen die overleden zijn)? Dit zijn dus uw ooms en/of tantes | <input type="radio"/> 0<br><input type="radio"/> 1<br><input type="radio"/> 2<br><input type="radio"/> 3<br><input type="radio"/> Meer dan 3 |

Onbekend

---

10.1.1 **If 10.1 is bigger than '0' answer this question:**  
Heeft een broer of zus van uw moeder ooit  
dikkedarmkanker gehad? Mocht u het niet van iedereen  
weten, vink dan het meest volledige antwoord aan

- Ja, 1 broer/zus  
 Ja, 2 broers/zussen  
 Ja, 3 broers/zussen  
 Ja, meer dan 3 broers/zussen  
 Nee  
 Onbekend

---

10.1.1.1 **If 10.1.1 is bigger than 'Nee' answer this question:**  
Hoe oud was oom of tante 1 toen dit werd ontdekt?

- Jonger dan 50 jaar  
 Tussen 50 en 70 jaar  
 Ouder dan 70 jaar  
 Onbekend

---

10.1.1.2 **If 10.1.1 is bigger than 'Ja, 1 broer/zus' answer this question:**  
Hoe oud was oom of tante 2 toen dit werd ontdekt?

- Jonger dan 50 jaar  
 Tussen 50 en 70 jaar  
 Ouder dan 70 jaar  
 Onbekend

---

10.1.1.3 **If 10.1.1 is bigger than 'Ja, 2 broers/zussen' answer this question:**  
Hoe oud was oom of tante 3 toen dit werd ontdekt?

- Jonger dan 50 jaar  
 Tussen 50 en 70 jaar  
 Ouder dan 70 jaar  
 Onbekend

---

10.1.1.4 **If 10.1.1 is bigger than 'Ja, 3 broers/zussen' answer this question:**  
Hoe oud was oom of tante 4 toen dit werd ontdekt?

- Jonger dan 50 jaar  
 Tussen 50 en 70 jaar  
 Ouder dan 70 jaar  
 Onbekend

---

10.1.2 **If 10.1 is bigger than '0' answer this question:**  
Heeft een broer of zus van uw moeder ooit een ander  
soort kanker dan dikkedarmkanker gehad? Mocht u het  
niet van iedereen weten, vink dan het meest volledige  
antwoord aan

- Ja, 1 broer/zus  
 Ja, 2 broers/zussen  
 Ja, 3 broers/zussen  
 Ja, meer dan 3 broers/zussen  
 Nee  
 Onbekend

---

10.1.2.1 **If 10.1.2 is bigger than 'Nee' answer this question:**  
Hoe oud was oom of tante 1 toen dit werd ontdekt?

- Jonger dan 50 jaar  
 Tussen 50 en 70 jaar  
 Ouder dan 70 jaar  
 Onbekend

---

10.1.2.2 **If 10.1.2 is bigger than 'Nee' answer this question:**  
In welk orgaan zat deze kanker? U kunt meerdere  
antwoorden aanvinken

- Maag  
 Dunne darm (o.a. twaalfvingerige darm)  
 Alveesklieer

- Galwegen
- Nierbekken
- Nieren
- Hogere urinewegen
- Eierstokken
- Hersenen
- Talgklier (goedaardig of kwaadaardig)
- Baarmoeder
- Baarmoederhals (Hierop wordt getest met het uitstrijkje bij het bevolkingsonderzoek)
- Prostaat
- Borst
- Huid
- Longen
- Lymfeklier/leukemie
- Slokdarm
- Anders
- Onbekend

10.1.2.3 **If 10.1.2 is bigger than 'Ja, 1 broer/zus' answer this question:**

Hoe oud was oom of tante 2 toen dit werd ontdekt?

- Jonger dan 50 jaar
- Tussen 50 en 70 jaar
- Ouder dan 70 jaar
- Onbekend

10.1.2.4 **If 10.1.2 is bigger than 'Ja, 1 broer/zus' answer this question:**

In welk orgaan zat deze kanker? U kunt meerdere antwoorden aanvinken

- Maag
- Dunne darm (o.a. twaalfvingerige darm)
- Alveesklier
- Galwegen
- Nierbekken
- Nieren
- Hogere urinewegen
- Eierstokken
- Hersenen
- Talgklier (goedaardig of kwaadaardig)
- Baarmoeder
- Baarmoederhals (Hierop wordt getest met het uitstrijkje bij het bevolkingsonderzoek)
- Prostaat
- Borst
- Huid
- Longen
- Lymfeklier/leukemie
- Slokdarm
- Anders
- Onbekend

10.1.2.5 **If 10.1.2 is bigger than 'Ja, 2 broers/zussen' answer this question:**  
Hoe oud was oom of tante 3 toen dit werd ontdekt?

- Jonger dan 50 jaar  
 Tussen 50 en 70 jaar  
 Ouder dan 70 jaar  
 Onbekend

10.1.2.6 **If 10.1.2 is bigger than 'Ja, 2 broers/zussen' answer this question:**  
In welk orgaan zat deze kanker? U kunt meerdere antwoorden aanvinken

- Maag  
 Dunne darm (o.a. twaalfvingerige darm)  
 Alveesklier  
 Galwegen  
 Nierbekken  
 Nieren  
 Hogere urinewegen  
 Eierstokken  
 Hersenen  
 Talgklier (goedaardig of kwaadaardig)  
 Baarmoeder  
 Baarmoederhals (Hierop wordt getest met het uitstrijkje bij het bevolkingsonderzoek)  
 Prostaat  
 Borst  
 Huid  
 Longen  
 Lymfeklier/leukemie  
 Slokdarm  
 Anders  
 Onbekend

10.1.2.7 **If 10.1.2 is bigger than 'Ja, 3 broers/zussen' answer this question:**  
Hoe oud was oom of tante 4 toen dit werd ontdekt?

- Jonger dan 50 jaar  
 Tussen 50 en 70 jaar  
 Ouder dan 70 jaar  
 Onbekend

10.1.2.8 **If 10.1.2 is bigger than 'Ja, 3 broers/zussen' answer this question:**  
In welk orgaan zat deze kanker? U kunt meerdere antwoorden aanvinken

- Maag  
 Dunne darm (o.a. twaalfvingerige darm)  
 Alveesklier  
 Galwegen  
 Nierbekken  
 Nieren  
 Hogere urinewegen  
 Eierstokken  
 Hersenen  
 Talgklier (goedaardig of kwaadaardig)  
 Baarmoeder

Baarmoederhals (Hierop wordt getest

met het uitstrijkje bij het  
bevolkingsonderzoek)

 Prostaat

 Borst

 Huid

 Longen

 Lymfeklier/leukemie

 Slokdarm

 Anders

 Onbekend

## Vragenlijst erfelijke darmkanker - Vragen over eventuele broers/zussen van vader

| Number   | Question                                                                                                                                                                                                  | Answers                                                                                                                                                                                                                                              |
|----------|-----------------------------------------------------------------------------------------------------------------------------------------------------------------------------------------------------------|------------------------------------------------------------------------------------------------------------------------------------------------------------------------------------------------------------------------------------------------------|
| 11.1     | Hoeveel broers en/of zussen heeft uw vader (ook degenen die overleden zijn)? Dit zijn dus uw ooms en/of tantes                                                                                            | <input type="radio"/> 0<br><input type="radio"/> 1<br><input type="radio"/> 2<br><input type="radio"/> 3<br><input type="radio"/> Meer dan 3<br><input type="radio"/> Onbekend                                                                       |
| 11.1.1   | <b>If 11.1 is bigger than '0' answer this question:</b><br>Heeft een broer of zus van uw vader ooit dikkedarmkanker gehad? Mocht u het niet van iedereen weten, vink dan het meest volledige antwoord aan | <input type="radio"/> Ja, 1 broer/zus<br><input type="radio"/> Ja, 2 broers/zussen<br><input type="radio"/> Ja, 3 broers/zussen<br><input type="radio"/> Ja, meer dan 3 broers/zussen<br><input type="radio"/> Nee<br><input type="radio"/> Onbekend |
| 11.1.1.1 | <b>If 11.1.1 is bigger than 'Nee' answer this question:</b><br>Hoe oud was oom of tante 1 toen dit werd ontdekt?                                                                                          | <input type="radio"/> Jonger dan 50 jaar<br><input type="radio"/> Tussen 50 en 70 jaar<br><input type="radio"/> Ouder dan 70 jaar<br><input type="radio"/> Onbekend                                                                                  |
| 11.1.1.2 | <b>If 11.1.1 is bigger than 'Ja, 1 broer/zus' answer this question:</b><br>Hoe oud was oom of tante 2 toen dit werd ontdekt?                                                                              | <input type="radio"/> Jonger dan 50 jaar<br><input type="radio"/> Tussen 50 en 70 jaar<br><input type="radio"/> Ouder dan 70 jaar<br><input type="radio"/> Onbekend                                                                                  |
| 11.1.1.3 | <b>If 11.1.1 is bigger than 'Ja, 2 broers/zussen' answer this question:</b>                                                                                                                               | <input type="radio"/> Jonger dan 50 jaar<br><input type="radio"/> Tussen 50 en 70 jaar<br><input type="radio"/> Ouder dan 70 jaar<br><input type="radio"/> Onbekend                                                                                  |

**this question:**

Hoe oud was oom of tante 3 toen dit werd ontdekt?

- Tussen 50 en 70 jaar
- Ouder dan 70 jaar
- Onbekend

11.1.1.4 **If 11.1.1 is bigger than 'Ja, 3 broers/zussen' answer this question:**

Hoe oud was oom of tante 4 toen dit werd ontdekt?

- Jonger dan 50 jaar
- Tussen 50 en 70 jaar
- Ouder dan 70 jaar
- Onbekend

11.1.2 **If 11.1 is bigger than '0' answer this question:**

Heeft een broer of zus van uw vader ooit een ander soort kanker dan dikkedarmkanker gehad? Mocht u het niet van iedereen weten, vink dan het meest volledige antwoord aan

- Ja, 1 broer/zus
- Ja, 2 broers/zussen
- Ja, 3 broers/zussen
- Ja, meer dan 3 broers/zussen
- Nee
- Onbekend

11.1.2.1 **If 11.1.2 is bigger than 'Nee' answer this question:**

Hoe oud was oom of tante 1 toen dit werd ontdekt?

- Jonger dan 50 jaar
- Tussen 50 en 70 jaar
- Ouder dan 70 jaar
- Onbekend

11.1.2.2 **If 11.1.2 is bigger than 'Nee' answer this question:**

In welk orgaan zat deze kanker? U kunt meerdere antwoorden aanvinken

- Maag
- Dunne darm (o.a. twaalfvingerige darm)
- Alveesklier
- Galwegen
- Nierbekken
- Nieren
- Hogere urinewegen
- Eierstokken
- Hersenen
- Talgklier (goedaardig of kwaadaardig)
- Baarmoeder
- Baarmoederhals (Hierop wordt getest met het uitstrijkje bij het bevolkingsonderzoek)
- Prostaat
- Borst
- Huid
- Longen
- Lymfeklier/leukemie
- Slokdarm
- Anders
- Onbekend

11.1.2.3 **If 11.1.2 is bigger than 'Ja, 1 broer/zus' answer this question:**

- Jonger dan 50 jaar





Prostaat Borst Huid Longen Lymfeklier/leukemie Slokdarm Anders Onbekend

---

11.1.2.7 If 11.1.2 is bigger than 'Ja, 3 broers/zussen' answer this question:  
Hoe oud was oom of tante 4 toen dit werd ontdekt?

 Jonger dan 50 jaar Tussen 50 en 70 jaar Ouder dan 70 jaar Onbekend

---

11.1.2.8 If 11.1.2 is bigger than 'Ja, 3 broers/zussen' answer this question:  
In welk orgaan zat deze kanker? U kunt meerdere antwoorden aanvinken

 Maag Dunne darm (o.a. twaalfvingerige darm) Alveesklier Galwegen Nierbekken Nieren Hogere urinewegen Eierstokken Hersenen Talgklier (goedaardig of kwaadaardig) Baarmoeder Baarmoederhals (Hierop wordt getest met het uitstrijkje bij het bevolkingsonderzoek) Prostaat Borst Huid Longen Lymfeklier/leukemie Slokdarm Anders Onbekend
